# Supplementary material for: Real-time manifold regularized context-aware correlation tracking
Source: Springer Nature journal article supplement (doi:10.1007/s11704-018-8104-y), 2019-08-30

# Real-time manifold regularized context-aware correlation tracking

Jiaqing FAN, Huihui SONG, Kaihua ZHANG, Qingshan  
LIU, Fei YAN, Wei LIAN

Frontiers of Computer Science, DOI: [10.1007/s11704-018-8104-y](https://doi.org/10.1007/s11704-018-8104-y)

# Problems & Ideas

- Problems of online single object visual tracking
  - Neglect of sample structure in correlation filter tracking
- Ideas: A fast manifold regularized context-aware correlation tracking algorithm
  - Mines the local manifold structure information

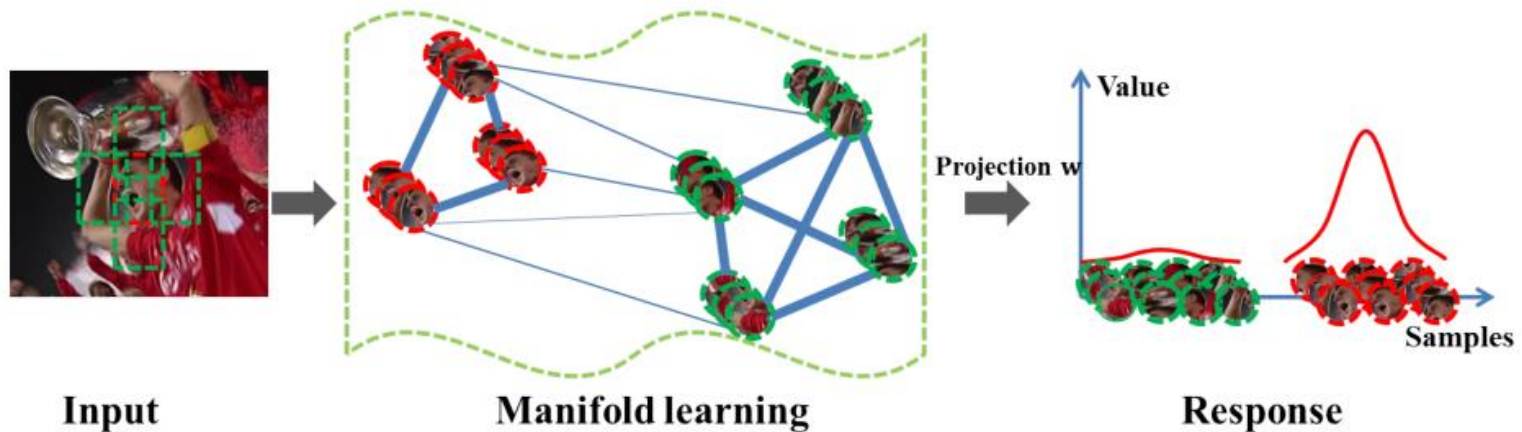

# Main Contributions

- OTB100 Results

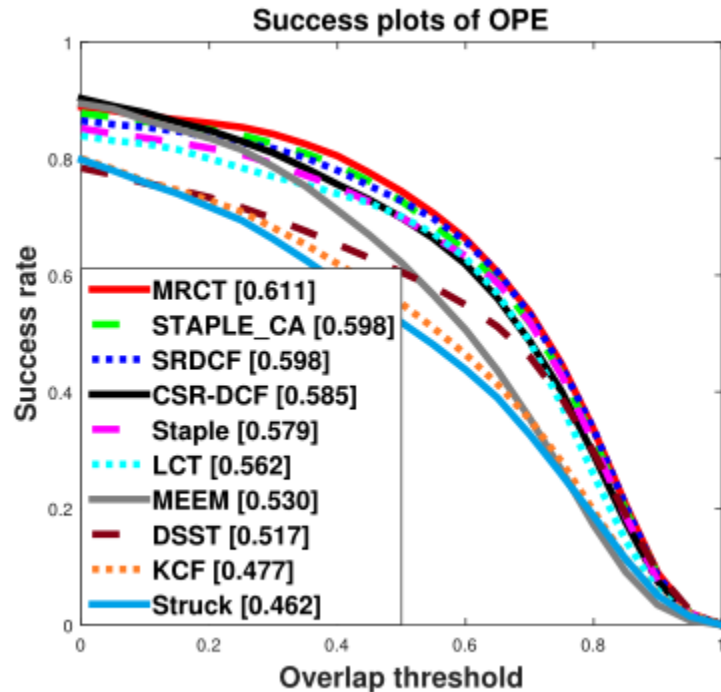

- VOT2016 Results

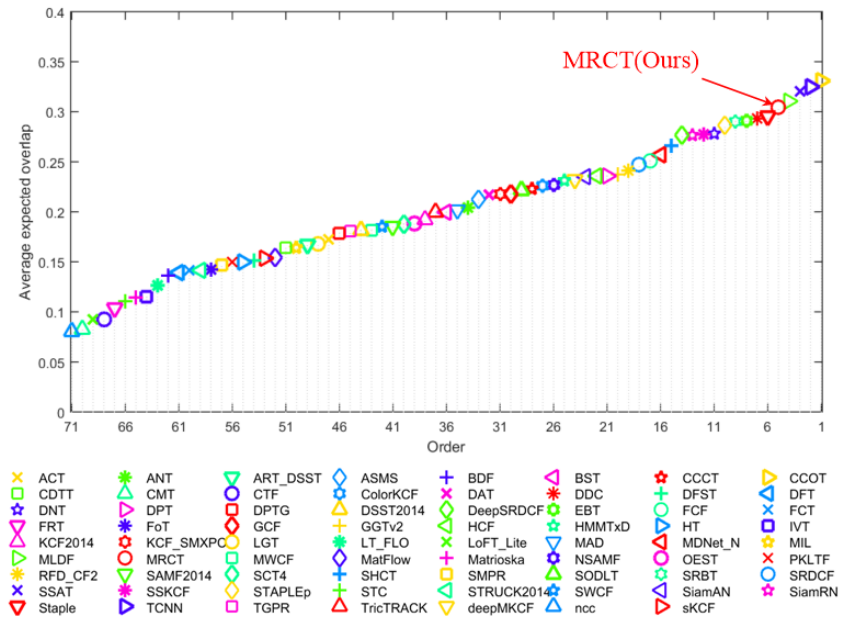

Supplement: 11704_2018_8104_MOESM1_ESM.pdf [file 11704_2018_8104_MOESM1_ESM.pdf]
